# Supplementary material for: Capturing the Kidney Transcriptome by Urinary Extracellular Vesicles – from Preanalytical Obstacles to Biomarker Research
Source: Preprints.org preprint supplement (doi:10.20944/preprints202305.2084.v1), 2023-05-30
Supplement: Supplementary file 3 [file Table S1_Barreiro et al.xlsx]

## Sheet: Sheet1
Raw counts										Normalized counts (Log2CPM)
id	L1_80	L2_80	L3_80	L4_80	L1_20	L2_20	L3_20	L4_20		id	L1_80	L2_80	L3_80	L4_80	L1_20	L2_20	L3_20	L4_20
hsa-miR-21-5p	102980	10329	50250	7481	610	114	251	129		hsa-miR-21-5p	15.464	14.4079	13.8897	14.1398	13.1738	11.8273	11.6728	12.1338
hsa-miR-375	16076	4043	23061	2805	56	42	14	0		hsa-miR-375	12.785	13.0549	12.7663	12.7248	9.73215	10.3884	7.52638	1.25961
hsa-miR-192-5p	12774	3013	24446	2371	47	39	53	18		hsa-miR-192-5p	12.4535	12.6308	12.8504	12.4824	9.48016	10.2816	9.43309	9.29725
hsa-miR-378a-3p	1019	649	3640	472	0	0	19	0		hsa-miR-378a-3p	8.81256	10.4179	10.1055	10.1562	1.25961	1.25961	7.96201	1.25961
hsa-miR-101-3p	1150	469	2241	22	0	0	0	0		hsa-miR-101-3p	8.98616	9.95025	9.40767	5.79364	1.25961	1.25961	1.25961	1.25961
hsa-miR-107	900	294	1374	235	1	0	1	1		hsa-miR-107	8.63442	9.27856	8.70512	9.15314	4.13249	1.25961	3.94409	5.21777
hsa-miR-320b	365	135	1234	129	0	0	3	0		hsa-miR-320b	7.34507	8.16224	8.55102	8.29283	1.25961	1.25961	5.3711	1.25961
hsa-miR-345-5p	581	58	230	75	0	0	0	0		hsa-miR-345-5p	8.00779	6.95932	6.16703	7.51833	1.25961	1.25961	1.25961	1.25961
hsa-miR-328-3p	427	53	261	71	0	0	0	0		hsa-miR-328-3p	7.56832	6.83188	6.34373	7.44032	1.25961	1.25961	1.25961	1.25961
hsa-miR-204-3p	71	45	672	21	0	0	0	0		hsa-miR-204-3p	5.06846	6.60119	7.68189	5.72948	1.25961	1.25961	1.25961	1.25961
hsa-miR-7-5p	529	22	89	56	0	0	0	0		hsa-miR-7-5p	7.87384	5.6055	4.87149	7.10325	1.25961	1.25961	1.25961	1.25961
hsa-miR-197-3p	409	7	165	34	0	0	0	0		hsa-miR-197-3p	7.50699	4.09796	5.70668	6.39952	1.25961	1.25961	1.25961	1.25961
hsa-miR-20b-5p	389	41	94	80	0	0	0	0		hsa-miR-20b-5p	7.43563	6.47036	4.94406	7.61026	1.25961	1.25961	1.25961	1.25961
hsa-miR-148a-5p	229	42	245	17	0	0	0	0		hsa-miR-148a-5p	6.68509	6.5042	6.25523	5.43987	1.25961	1.25961	1.25961	1.25961
hsa-miR-10a-3p	29	61	348	18	0	0	0	0		hsa-miR-10a-3p	3.91858	7.03071	6.74809	5.5179	1.25961	1.25961	1.25961	1.25961
hsa-miR-629-5p	63	12	350	13	0	0	0	0		hsa-miR-629-5p	4.90901	4.78897	6.75618	5.07712	1.25961	1.25961	1.25961	1.25961
hsa-miR-92a-1-5p	72	45	274	12	0	0	0	0		hsa-miR-92a-1-5p	5.08721	6.60119	6.41183	4.97015	1.25961	1.25961	1.25961	1.25961
hsa-miR-193b-3p	279	17	82	21	0	0	0	0		hsa-miR-193b-3p	6.96397	5.25425	4.76335	5.72948	1.25961	1.25961	1.25961	1.25961
hsa-miR-340-5p	140	23	179	55	0	0	0	0		hsa-miR-340-5p	5.99635	5.66654	5.81899	7.07771	1.25961	1.25961	1.25961	1.25961
hsa-miR-3065-5p	218	40	104	31	0	0	0	0		hsa-miR-3065-5p	6.61576	6.43571	5.07908	6.27021	1.25961	1.25961	1.25961	1.25961
hsa-miR-106a-5p	236	24	86	22	0	0	0	0		hsa-miR-106a-5p	6.72753	5.7251	4.82613	5.79364	1.25961	1.25961	1.25961	1.25961
hsa-miR-7704	133	31	166	16	0	0	0	0		hsa-miR-7704	5.92519	6.07952	5.715	5.35737	1.25961	1.25961	1.25961	1.25961
hsa-miR-324-5p	55	14	198	29	0	0	0	0		hsa-miR-324-5p	4.72972	4.9934	5.95865	6.17708	1.25961	1.25961	1.25961	1.25961
hsa-miR-374b-5p	115	17	84	25	0	0	0	0		hsa-miR-374b-5p	5.72427	5.25425	4.79508	5.97057	1.25961	1.25961	1.25961	1.25961
hsa-miR-99b-3p	84	20	97	36	0	0	0	0		hsa-miR-99b-3p	5.29501	5.47507	4.98591	6.47971	1.25961	1.25961	1.25961	1.25961
hsa-miR-4728-3p	51	10	107	68	0	0	0	0		hsa-miR-4728-3p	4.63096	4.55071	5.11724	7.37891	1.25961	1.25961	1.25961	1.25961
hsa-miR-132-3p	65	44	85	32	0	0	0	0		hsa-miR-132-3p	4.95055	6.56958	4.81069	6.31461	1.25961	1.25961	1.25961	1.25961
hsa-miR-361-5p	54	11	79	74	0	0	0	0		hsa-miR-361-5p	4.70565	4.67475	4.7144	7.49922	1.25961	1.25961	1.25961	1.25961
hsa-miR-664a-5p	65	37	90	24	0	0	0	0		hsa-miR-664a-5p	4.95055	6.32647	4.8863	5.91397	1.25961	1.25961	1.25961	1.25961
hsa-miR-10a-5p	27586	9256	145958	6718	6646	2621	13828	2676		hsa-miR-10a-5p	13.5638	14.2497	15.4279	13.9846	16.619	16.3494	17.4555	16.5077
hsa-miR-125a-5p	1174	95	2009	788	261	164	338	106		hsa-miR-125a-5p	9.01582	7.66035	9.25059	10.8944	11.9495	12.3517	12.1018	11.8507
hsa-miR-92b-3p	1098	187	1932	239	89	103	217	152		hsa-miR-92b-3p	8.91973	8.62896	9.19444	9.17739	10.399	11.681	11.4629	12.3704
hsa-miR-3960	70	35	201	0	30	56	23	29		hsa-miR-3960	5.04947	6.24875	5.97951	1.25961	8.8352	10.8028	8.23524	9.98322
