# Supplementary material for: Capturing the Kidney Transcriptome by Urinary Extracellular Vesicles – from Preanalytical Obstacles to Biomarker Research
Source: Preprints.org preprint supplement (doi:10.20944/preprints202305.2084.v1), 2023-05-30
Supplement: Supplementary file 4 [file Table S2_ Barreiro et al.xlsx]

## Sheet: mRNA temp
miRNA Raw counts										mRNA Raw counts
	-80°C				-20°C						-80°C				-20°C
	L1_80	L2_80	L3_80	L4_80	L1_20	L4_20	L3_20	L2_20		id	L1_80	L2_80	L3_80	L4_80	L1_20	L4_20	L3_20	L2_20
hsa-miR-29b-3p	36	15	122	19	0	0	0	0		ENSG00000160801	95	198	215	65	0	16	0	0
hsa-miR-130a-3p	78	62	79	0	0	0	1	0		ENSG00000070915	399	204	732	48	0	0	0	0
hsa-miR-99a-5p	117	19	170	69	0	0	0	10		ENSG00000164325	82	120	158	95	0	0	0	0
hsa-miR-29c-3p	686	37	313	88	0	0	29	0		ENSG00000010932	94	89	194	60	0	0	0	0
hsa-miR-27a-3p	685	54	694	159	0	18	20	0		ENSG00000158296	17	162	178	44	0	0	0	0
hsa-miR-29a-3p	2198	72	534	95	78	0	14	8		ENSG00000144214	51	139	131	40	0	0	0	0
hsa-miR-191-5p	721	303	1799	396	74	55	110	83		ENSG00000131183	25	45	67	31	0	0	0	0
hsa-miR-101-3p	1150	469	2241	22	0	0	0	0		ENSG00000081800	27	61	13	51	0	0	0	0
hsa-miR-16-5p	2491.5	154	1987	242	60	0	56	0		ENSG00000197891	6	91	10	36	0	0	0	0
hsa-miR-23a-3p	314	58	4876	15	0	19	18	0		ENSG00000241119	17	29	63	13	0	0	0	0
hsa-miR-24-3p	2205	466	2415	494	48	17	109	0		ENSG00000140839	5	6	12	7	0	0	0	0
hsa-miR-22-3p	3046	929	7393	1251	129	67	138	50		ENSG00000158089	82	103	198	35	21	0	0	2
hsa-miR-181a-5p	7949	1606	10847	397	78	1	55	0		ENSG00000100253	1415	1385	1563	609	1	98	0	6
hsa-let-7i-5p	7951	2045	9507	1718	64	125	4	50		ENSG00000204511	96	175	109	165	65	54	0	36
hsa-miR-23b-3p	802	92	20344	720	174	58	88	55		ENSG00000144035	309	915	1345	393	82	531	0	94
hsa-miR-27b-3p	7062	1531	11864	2139	152	161	186	47		ENSG00000198398	76	81	163	0	139	296	0	183
hsa-miR-192-5p	12774	3013	24446	2371	47	18	53	39		ENSG00000147614	137	121	168	33	45	446	13	229
hsa-let-7g-5p	20511	5969	28766	6181	464	174	374	69		ENSG00000166589	302	223	926	126	0	113	21	0
hsa-miR-26a-5p	31864	9255	57986	8667	1433	599	1945	593		ENSG00000162366	352	827	1102	563	31	10	27	95
hsa-miR-204-5p	26230	8435	77294	5737	1612	473	3637	499		ENSG00000169344	356	1324	1158	309	27	76	32	0
hsa-miR-26b-5p	56146	10402	62430	8743	477	266	440	204		ENSG00000116218	13	44	21	21	33	0	37	0
hsa-miR-30c-5p	86823.5	7716	41001	8986.5	2973	509	1365.5	386		ENSG00000147003	46	93	108	8	26	0	40	0
hsa-miR-21-5p	102980	10329	50250	7481	610	129	251	114		ENSG00000205795	412	665	853	248	1	347	71	28
hsa-let-7c-5p	46967	45016	213953	16340	613	809	1608	331		ENSG00000179023	318	136	283	95	0	281	88	0
hsa-let-7f-5p	97642.5	55307	280062	23328.5	998	1255.5	1648.5	595		ENSG00000086991	80	114	199	42	0	114	189	0
hsa-miR-10b-5p	91402	49897	672452	20488	12984	4899	26243	6950		ENSG00000112499	55	248	202	66	35	395	227	72
hsa-miR-30a-5p	579315	54709	336628	16807	3317	1260	2453	690		ENSG00000113946	147	247	173	2	587	745	373	405
hsa-let-7b-5p	202368	167699	761936	42079	5318	4328	8089	2750		ENSG00000173930	105	104	190	5	389	0	431	77
hsa-let-7a-5p	349622	256738	1.07044e+06	100063	6765.33	3960.33	7303.67	3705.33		ENSG00000150201	1222	2010	773	615	1177	361	465	216
										ENSG00000165685	1184	689	1605	841	2078	1677	681	200
										ENSG00000151704	583	445	499	174	1292	1847	1021	1340
										ENSG00000074803	820	622	1505	654	2140	3641	1360	697
										ENSG00000272398	5029	6625	6790	4193	8220	10671	5359	4135
