# Supplementary material for: Capturing the Kidney Transcriptome by Urinary Extracellular Vesicles – from Preanalytical Obstacles to Biomarker Research
Source: Preprints.org preprint supplement (doi:10.20944/preprints202305.2084.v1), 2023-05-30
Supplement: Supplementary file 5 [file Table S3_ Barreiro et al.xlsx]

## Sheet: KE miRNAs raw
Raw miRNA counts
id	HFD_1	HFD_2	HFD_3	HFD_4	HFD_5	HFD_6	HFD_7	HFD_8	HFD_9	HFD_10	UC_1	UC_2	UC_3	UC_4	UC_5	UC_6	UC_7	UC_8	UC_9	UC_10	NG_1	NG_2	NG_3	NG_6	NG_7	NG_8
hsa-let-7a-5p	87452	53894	23525	27193	45764	59280	58085	65474	39500	38874	324566	248357	57953	38705	105597	226430	237799	37413	131427	187614	288642	9019	9485	179019	53599	41740
hsa-let-7b-5p	90601	48386	21529	32084	78630	56723	56856	63682	53552	42339	311956	226418	44252	35315	120618	189057	218242	28710	120661	167501	258005	7282	7555	158500	45219	38073
hsa-let-7f-5p	32110	28780	12338	9358	9888	20608	22168	28250	15151	14226	133926	141554	37090	17923	45021	98256	94874	19594	72171	97870	118733	4957	5259	74666	29886	20439
hsa-miR-30a-5p	22678	22240	19382	9120	7686	15084	17387	16580	11966	11406	103325	108186	50973	16495	44384	104485	80483	12405	54741	92415	97219	3710	4722	62590	22844	16526
hsa-let-7c-5p	24210	12336	8216	8340	9659	15440	14262	18726	14319	13691	74027	54490	14236	9552	21399	42674	56061	7479	27891	47300	63082	1758	2073	37971	11571	10089
hsa-miR-26a-5p	10761	10471	5836	3189	3573	5213	8587	6901	4419	3633	67174	52264	19283	6919	22071	44273	39762	6221	29736	36726	51148	1911	2087	31856	11310	7519
hsa-miR-10b-5p	10581	9703	6063	6050	5140	6731	8004	8997	8052	6135	56736	48656	14063	9378	27272	31538	36798	4615	35706	34079	43013	1553	1674	25424	9700	7724
hsa-miR-26b-5p	6536	6718	2932	2112	2222	3123	4994	5187	2886	2792	40626	34605	14720	5245	14784	23051	26628	4058	19109	26322	30405	1074	1177	18199	7068	4814
hsa-miR-204-5p	5665	6442	1352	4415	3820	4595	4403	6431	5879	7450	25981	35993	3723	5711	12023	20630	22317	2993	23724	25201	24164	1032	916	14299	6139	5470
hsa-miR-16-5p	5017	5831	2462	1753	1859	2208	3930	3521	2296	2357	33805	31631	8013	3604	11563	17092	20086	2993	14624	20267	23685	847	927	13804	6033	3593
hsa-miR-21-5p	4312	4175	3075	1379	946	2066	3097	3354	2391	1967	22267	18953	12548	3114	7120	12338	18138	2560	9905	20506	18442	781	851	10775	4598	3239
hsa-miR-192-5p	3424	2333	2975	1675	782	1583	2539	3950	2604	4257	14943	8685	10240	2533	3674	8611	25137	1346	10130	40049	18198	355	455	9300	2515	4698
hsa-miR-191-5p	3733	2765	2105	2912	2621	2559	2738	4965	4430	4461	18903	12780	5731	4146	7363	10332	13296	2027	16719	21682	15015	352	500	8989	2718	4194
hsa-let-7i-5p	4069	3223	1559	1329	4362	2651	2934	2575	1934	1584	16562	16262	4026	1929	9109	12632	11432	1784	6941	10995	14918	622	602	9340	3437	2476
hsa-miR-27b-3p	2412	2025	732	759	844	1157	1886	1817	1087	1302	11108	9839	3189	1351	3493	9468	10817	1179	5204	11766	11557	371	392	7079	2208	2059
hsa-miR-29c-3p	1593	2520	2985	625	326	665	1306	1311	829	545	9374	8779	12602	1266	3435	6838	6039	1414	5932	7705	7688	388	555	4722	2558	1430
hsa-miR-23b-3p	1744	919	794	621	925	1084	1371	1447	1049	1113	7890	4125	1993	951	2200	7024	6981	850	3830	7818	7631	167	212	4750	1035	1337
hsa-miR-29a-3p	1131	1771	3456	489	704	491	883	889	542	590	6786	5675	9415	866	3120	3560	5187	739	3629	6041	5463	296	435	3136	1861	964
hsa-let-7g-5p	1367	1490	804	579	1582	836	918	1228	822	800	6329	7109	2420	931	3852	4305	4278	974	4075	4620	5297	265	236	3094	1530	1008
hsa-miR-29b-3p	699	999	685	239	209	298	549	626	374	292	3688	4514	3114	597	2251	3046	2778	665	2890	3571	3269	169	206	2017	1076	706
hsa-miR-101-3p	750	953	212	212	116	273	619	537	262	269	4632	5048	1501	577	1698	2973	3326	589	2334	3234	3845	169	139	2239	1126	589
hsa-miR-24-3p	748	516	259	305	693	521	585	565	437	418	3270	2232	811	474	1489	3077	2826	427	2090	2806	3393	85	83	2099	534	530
hsa-miR-320a-3p	694	401	95	341	1301	449	603	650	810	578	3844	2186	298	426	2091	2371	2191	390	1813	2619	2833	72	75	1706	423	526
hsa-miR-99a-5p	557	574	1066	307	216	250	390	502	342	343	3254	1836	3279	462	1322	1286	2039	262	1588	3330	2224	74	162	1278	669	544
hsa-miR-23a-3p	526	408	378	284	526	335	431	444	441	296	2500	2028	865	478	1465	2151	1716	290	2062	1763	2155	74	81	1288	474	466
hsa-miR-22-3p	245	225	218	72	124	135	196	164	126	102	1218	729	693	113	405	944	812	178	487	1042	1135	34	50	743	246	183
hsa-miR-181a-5p	176	175	85	70	490	115	147	159	144	144	894	1005	313	105	828	658	709	107	529	1019	775	32	36	459	199	188
hsa-miR-126-3p	169	76	51	37	59	165	121	161	91	54	418	343	126	72	231	1004	806	84	564	391	808	9	11	485	66	102
hsa-miR-27a-3p	99	127	104	37	76	51	75	75	54	45	521	746	285	87	417	445	406	66	381	286	427	33	28	250	135	71
hsa-miR-130a-3p	64	48	23	20	27	31	49	37	31	19	324	287	92	30	109	308	191	26	144	155	305	8	14	190	53	27
hsa-miR-195-5p	67	25	23	8	13	30	43	25	8	7	605	67	191	28	62	105	151	14	68	66	289	3	7	151	36	23
hsa-miR-199a-3p	45	21	16	9	96	16	35	30	38	4	122	106	55	22	134	215	198	21	61	101	207	2	10	133	25	20
hsa-miR-199b-3p	45	21	16	9	96	16	35	30	38	4	122	106	55	22	134	215	198	21	61	101	207	2	10	133	25	20
hsa-miR-143-3p	37	6	7	12	75	16	35	38	38	6	59	8	10	10	70	130	364	9	101	43	236	1	2	125	7	8
hsa-miR-15a-5p	19	8	16	7	10	10	10	13	1	9	110	57	75	15	34	60	92	9	60	86	86	1	4	49	20	7
hsa-miR-12136	12	10	9	104	60	13	12	31	43	58	73	15	13	20	17	22	22	14	42	47	47	9	4	35	11	26
Raw mRNA counts
id	HFD_25	HFD_29	HFD_31	HFD_32	HFD_30	HFD_755B	HFD_123D	HFD_847	HFD_64	HFD_93B	UC_25	UC_29	UC_31	UC_32	UC_30	UC_755B	UC_123D	UC_847	UC_64	UC_93B	NG_755B	NG_123D	NG_847	NG_25	NG_29	NG_31
ENSG00000010932	121	7	0	36	1	299	4	64	324	264	102	223	1	54	147	345	359	0	245	261	0	1	0	1	0	0
ENSG00000070915	156	134	0	271	275	0	92	271	155	0	172	44	0	698	855	257	134	0	531	0	0	4	0	6	3	0
ENSG00000074803	2235	328	357	542	569	1073	668	394	783	3	3026	301	329	816	668	1755	1151	469	801	12	365	8	0	1	0	0
ENSG00000086991	66	127	87	48	62	295	113	77	398	3	181	1	0	2	198	299	200	0	327	223	0	2	0	0	0	0
ENSG00000100253	3722	1368	94	273	772	5763	1030	1031	2367	1142	3034	1297	425	809	1210	5066	1699	1343	1714	1764	290	4	403	240	270	0
ENSG00000112499	153	129	19	55	228	132	12	24	65	1	226	28	0	19	227	209	69	0	117	306	0	6	0	0	0	0
ENSG00000113946	162	37	39	137	82	160	41	13	257	120	436	156	0	153	89	294	70	0	129	48	0	1	0	6	10	0
ENSG00000116218	28	11	0	0	19	270	0	9	28	23	73	51	0	0	13	337	28	165	27	106	178	0	0	0	0	1
ENSG00000124564	4	30	55	19	1	103	81	109	110	0	47	0	0	98	4	129	310	0	135	398	0	0	0	0	0	0
ENSG00000144035	308	53	31	57	187	482	239	116	335	282	365	78	24	87	372	344	488	82	183	465	0	0	0	0	0	0
ENSG00000144214	146	51	25	66	102	163	132	14	50	236	164	0	0	53	83	77	343	283	95	261	0	0	0	0	0	0
ENSG00000147003	84	0	25	35	19	70	51	23	76	10	30	42	0	34	20	71	58	0	18	0	0	0	0	0	0	0
ENSG00000147614	116	22	0	46	146	171	80	35	179	84	194	46	39	124	340	123	115	66	94	0	0	0	0	6	1	0
ENSG00000150201	1531	1614	46	1180	851	562	276	180	624	368	2656	3962	223	2503	1616	845	276	376	824	376	101	0	1	0	222	0
ENSG00000151704	1048	744	114	431	195	591	373	247	546	219	1636	776	134	600	1081	634	1114	722	478	188	378	1	0	8	0	0
ENSG00000158089	286	146	62	150	164	286	134	110	300	158	181	150	130	118	177	236	172	369	78	443	0	5	0	1	0	0
ENSG00000158296	119	117	0	24	76	119	0	8	58	40	56	0	0	37	0	15	3	0	169	240	0	0	2	0	0	0
ENSG00000160801	496	250	0	45	136	294	178	126	232	21	658	267	73	89	197	783	210	438	202	12	346	3	1	3	0	0
ENSG00000162366	1374	424	127	178	741	1474	1427	440	1225	1763	1564	556	98	469	791	1395	2088	463	708	1867	0	0	0	0	82	0
ENSG00000164325	206	3	74	5	69	218	151	115	126	100	119	57	0	1	53	313	254	2	105	358	0	3	0	0	0	0
ENSG00000165685	1940	572	17	1322	1017	1090	802	472	886	282	2645	376	406	1721	2384	1319	2037	822	1030	1420	0	2	34	5	276	0
ENSG00000166589	511	681	0	404	510	843	181	72	646	113	1287	825	0	1146	324	1064	6	207	1304	3	0	0	0	1	0	0
ENSG00000169344	1283	984	79	383	407	805	337	290	535	292	2117	706	135	1322	1653	1784	439	566	983	192	177	0	1	229	1	0
ENSG00000179023	190	900	107	111	559	1031	0	300	806	26	123	404	25	201	585	872	0	785	899	70	0	1	0	2	0	82
ENSG00000197891	114	77	0	16	89	25	35	0	45	5	114	68	90	78	0	191	0	36	33	81	0	0	0	1	0	0
ENSG00000197901	79	3	0	14	86	413	50	50	133	224	157	1	45	47	76	84	82	0	64	0	0	0	0	0	0	0
ENSG00000198398	67	37	0	68	91	0	36	15	40	81	146	0	0	123	149	105	53	0	3	0	0	0	0	0	0	0
ENSG00000204511	198	139	0	53	146	200	346	74	233	435	306	133	0	161	155	352	623	40	277	296	0	0	0	1	0	0
ENSG00000205795	2555	2463	36	627	794	627	505	353	533	121	4243	2433	200	1406	1357	1530	1098	789	520	461	0	0	0	199	95	1
ENSG00000241119	69	12	32	1	38	67	0	12	22	0	19	17	55	0	0	10	113	0	82	13	0	0	1	0	0	0
ENSG00000272398	4135	4493	447	5831	3584	5476	886	3653	12739	3867	5052	4789	1928	9343	5743	4869	1500	4552	11672	4804	29	0	2	54	181	0
	mean normalized counts							normalized counts
	HFD	UC	UC-HFD	%				HFD_1	HFD_2	HFD_3	HFD_4	HFD_5	HFD_6	HFD_7	HFD_8	HFD_9	HFD_10	UC_1	UC_2	UC_3	UC_4	UC_5	UC_6	UC_7	UC_8	UC_9	UC_10	NG_1	NG_2	NG_3	NG_6	NG_7	NG_8
hsa-let-7f-5p	25597.3	29673.3	4075.98	13.7362			hsa-let-7f-5p	35095.1	36897.8	27955.1	20802.9	18173.1	35379.5	31885.5	32845.6	22078.8	24303.9	29471.8	40639.5	26229	25238.1	23046.9	35687.3	30252.7	38053.9	28653.2	27360.4	33182	41390	37085.2	34524	38546.8	28611.7
hsa-miR-101-3p	436.48	956.031	519.551	54.3446			hsa-miR-101-3p	819.723	1221.81	480.344	471.277	213.196	468.683	890.342	624.358	381.8	459.564	1019.32	1449.26	1061.47	812.497	869.231	1079.82	1060.57	1143.91	926.64	904.091	1074.55	1411.12	980.193	1035.27	1452.31	824.517
hsa-miR-130a-3p	44.6596	60.1513	15.4918	25.7547			hsa-miR-130a-3p	69.9497	61.5391	52.1128	44.4601	49.6232	53.2204	70.4794	43.0191	45.1748	32.4599	71.2996	82.3963	65.0599	42.2442	55.7987	111.868	60.9046	50.4951	57.1706	43.3315	85.2376	66.7984	98.7245	87.8521	68.3591	37.7962
hsa-miR-15a-5p	13.8426	20.9436	7.10102	33.9054			hsa-miR-15a-5p	20.7663	10.2565	36.2524	15.561	18.379	17.1679	14.3835	15.1148	1.45725	15.3758	24.2067	16.3644	53.0379	21.1221	17.4051	21.7925	29.3362	17.4791	23.8211	24.042	24.0342	8.3498	28.207	22.6566	25.7959	9.79901
hsa-miR-16-5p	3761.77	5747.79	1986.02	34.5527			hsa-miR-16-5p	5483.4	7475.72	5578.33	3896.93	3416.65	3790.66	5652.73	4093.79	3345.85	4026.74	7439.14	9081.11	5666.57	5074.94	5919.27	6207.95	6404.87	5812.77	5805.99	5665.81	6619.19	7072.28	6536.97	6382.68	7781.33	5029.69
hsa-miR-192-5p	3923.07	4401.18	478.11	10.8632			hsa-miR-192-5p	3742.31	2991.06	6740.67	3723.53	1437.24	2717.67	3651.98	4592.58	3794.68	7272.73	3288.36	2493.42	7241.45	3566.82	1880.77	3127.58	8015.49	2614.09	4021.79	11196	5085.75	2964.18	3208.55	4300.13	3243.83	6576.54
hsa-miR-195-5p	24.3107	30.3235	6.01283	19.8289			hsa-miR-195-5p	73.2286	32.0516	52.1128	17.784	23.8927	51.5036	61.8493	29.0669	11.658	11.9589	133.137	19.2354	135.07	39.4279	31.7387	38.1368	48.1497	27.1897	26.9972	18.4508	80.7661	25.0494	49.3623	69.8193	46.4326	32.1967
hsa-miR-21-5p	3182.57	4524.66	1342.09	29.6617			hsa-miR-21-5p	4712.86	5352.62	6967.25	3065.52	1738.65	3546.88	4454.59	3899.62	3484.29	3360.46	4900.09	5441.32	8873.6	4384.95	3644.83	4481.26	5783.7	4971.83	3932.46	5732.62	5153.94	6521.2	6001.04	4982.14	5930.48	4534.14
hsa-miR-22-3p	194.712	256.61	61.8975	24.1213			hsa-miR-22-3p	267.776	288.464	493.938	160.056	227.899	231.766	281.918	190.679	183.614	174.259	268.034	209.292	490.071	159.12	207.325	342.868	258.924	345.697	193.348	291.3	317.196	283.893	352.588	343.548	317.289	256.174
hsa-miR-23b-3p	1675.68	1728.92	53.2392	3.07934			hsa-miR-23b-3p	1906.13	1178.22	1799.02	1380.49	1700.06	1861	1971.98	1682.39	1528.66	1901.47	1736.28	1184.27	1409.39	1339.14	1126.21	2551.17	2226.05	1650.8	1520.58	2185.59	2132.62	1394.42	1494.97	2196.3	1334.94	1871.61
hsa-miR-26a-5p	7212.58	11879.4	4666.82	39.285			hsa-miR-26a-5p	11761.4	13424.5	13223	7089.16	6566.81	8949.61	12351.2	8023.64	6439.59	6206.68	14782.3	15004.7	13636.4	9742.92	11298.5	16080.3	12679	12081.9	11805.7	10267.1	14294.2	15956.5	14717	14729.6	14587.6	10525.5
hsa-miR-26b-5p	4857.78	7692.07	2834.29	36.847			hsa-miR-26b-5p	7143.61	8612.91	6643.25	4694.98	4083.81	5361.52	7183.14	6030.81	4205.62	4769.9	8940.18	9934.93	10409.6	7385.69	7568.14	8372.3	8490.93	7881.12	7586.62	7358.53	8497.21	8967.69	8299.91	8414.84	9116.27	6738.92
hsa-miR-27a-3p	92.0431	142.834	50.7905	35.5592			hsa-miR-27a-3p	108.203	162.822	235.64	82.2511	139.68	87.5561	107.877	87.2008	78.6915	76.8788	114.652	214.173	201.544	122.508	213.468	161.627	129.462	128.18	151.264	79.9537	119.333	275.544	197.449	115.595	174.122	99.39
hsa-miR-27b-3p	1857.62	2462.41	604.791	24.5609			hsa-miR-27b-3p	2636.23	2596.18	1658.55	1687.26	1551.19	1986.32	2712.74	2112.59	1584.03	2224.36	2444.43	2824.73	2255.17	1902.4	1788.12	3438.85	3449.24	2289.76	2066.08	3289.28	3229.81	3097.78	2764.29	3273.18	2847.87	2882.31
hsa-miR-29a-3p	1009.21	1445.74	436.528	30.1941			hsa-miR-29a-3p	1236.14	2270.54	7830.51	1087.05	1293.88	842.942	1270.07	1033.62	789.83	1007.97	1493.33	1629.27	6658.03	1219.45	1597.17	1293.02	1653.99	1435.23	1440.78	1688.81	1526.73	2471.54	3067.51	1450.02	2400.31	1349.46
hsa-miR-29c-3p	1132.27	2213.34	1081.07	48.8433			hsa-miR-29c-3p	1741.09	3230.8	6763.33	1389.38	599.155	1141.66	1878.49	1524.27	1208.06	931.087	2062.85	2520.41	8911.79	1782.7	1758.43	2483.61	1925.67	2746.16	2355.11	2154	2148.55	3239.72	3913.72	2183.35	3299.29	2001.8
hsa-miR-30a-5p	19416.1	25926.4	6510.27	25.1106			hsa-miR-30a-5p	24786.2	28513.1	43915.2	20273.8	14126.1	25896	25008.7	19277.2	17437.5	19486.2	22737.8	31059.7	36046.7	23227.3	22720.8	37949.8	25663.8	24092	21733.2	25835.4	27169.6	30977.8	33298.4	28940.3	29464.1	23134.1
hsa-miR-99a-5p	529.446	644.104	114.658	17.8012			hsa-miR-99a-5p	608.781	735.905	2415.31	682.462	396.986	429.197	560.958	583.664	498.38	585.987	716.077	527.107	2318.82	650.561	676.751	467.085	650.181	508.836	630.465	930.929	621.536	617.885	1142.38	590.921	862.873	761.523
